# Supplementary material for: Tumor hypoxia modulates podoplanin/CCL21 interactions in CCR7+ NK cell recruitment and CCR7+ tumor cell mobilization
Source: PubMed Central journal article supplement (PMC5458255; doi:10.18632/oncotarget.16311), 2017-03-17
Supplement: oncotarget-08-31876-s001.pdf [file oncotarget-08-31876-s001.pdf]

## Tumor hypoxia modulates podoplanin/CCL21 interactions in CCR7+ NK cell recruitment and CCR7+ tumor cell mobilization

### SUPPLEMENTARY FIGURES

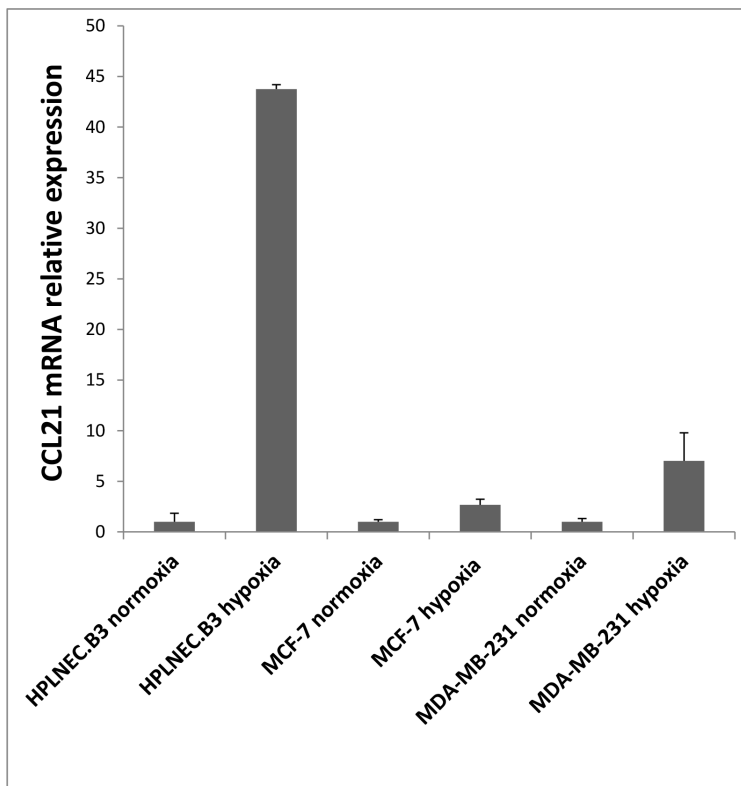

**Supplementary Figure 1: CCL21 expression in cell lines upon modulation by hypoxia.** Cells were cultured for 24 hours in normoxia or hypoxia (O<sub>2</sub> 1%) then RNA were extracted, and quantified by RQPCR.

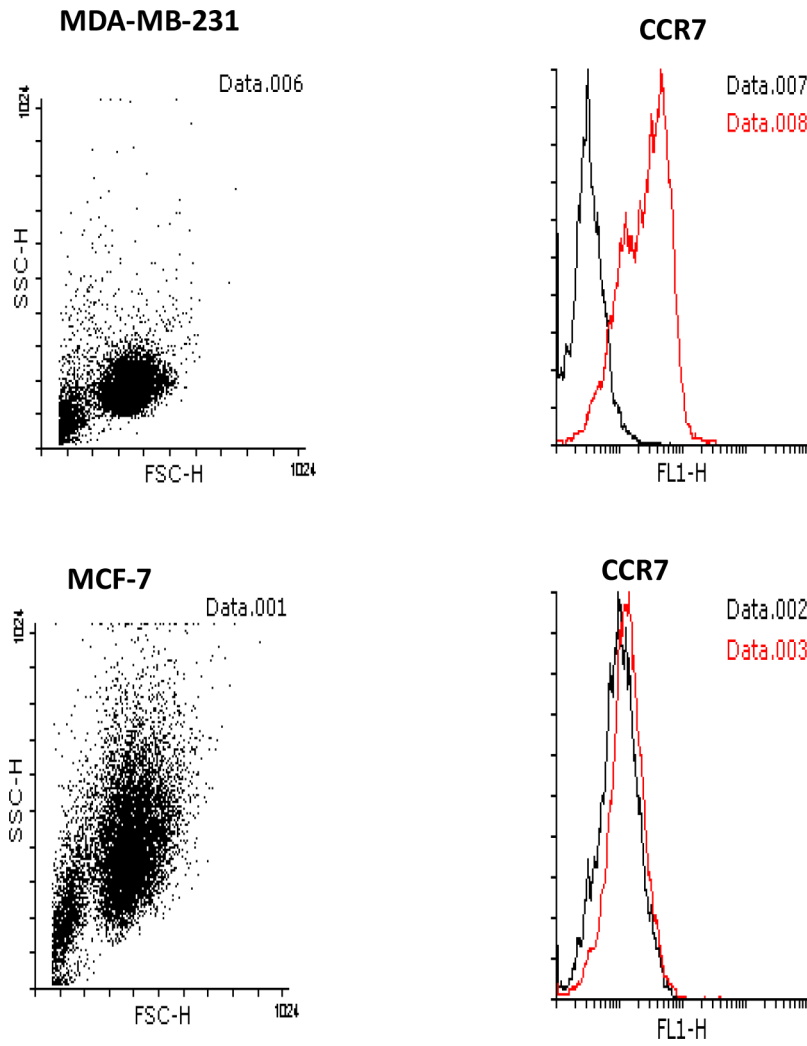

**Supplementary Figure 2: Expression of CCR7 on cancer cells MDA-MB-231 and MCF7 cells were labelled by FTC anti CCR7 antibodies at 4°C, 1 h. Labeling was assessed by Flow Cytometry on FACS LSR.**

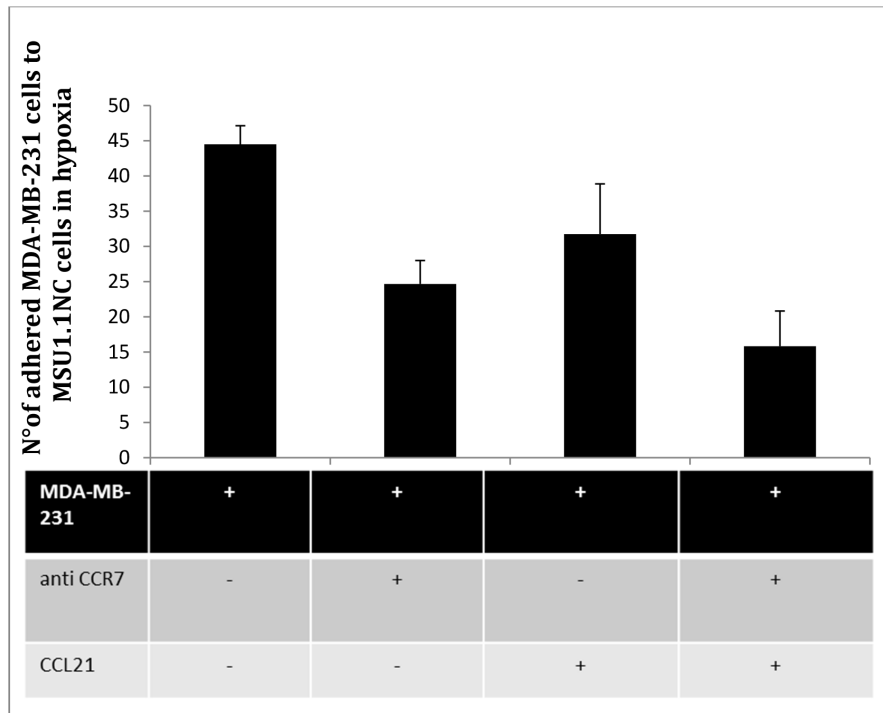

**Supplementary Figure 3: CCL21/CCR7 interaction in MDA-MB-231 MSU1.1 NC cells in hypoxia.** Quantification of the MDA-MB-231 cells adhesion to MSU1.1 cells surface. MDA-MB-231 cells were counted on the surface of MSU1.1 NC or MSU1.1 PDPN cells (ten representative fields were counted) after flow adhesion in normoxia. \*  $p < 0.05$ ,  $N = 3$  (mean from ten representative fields).

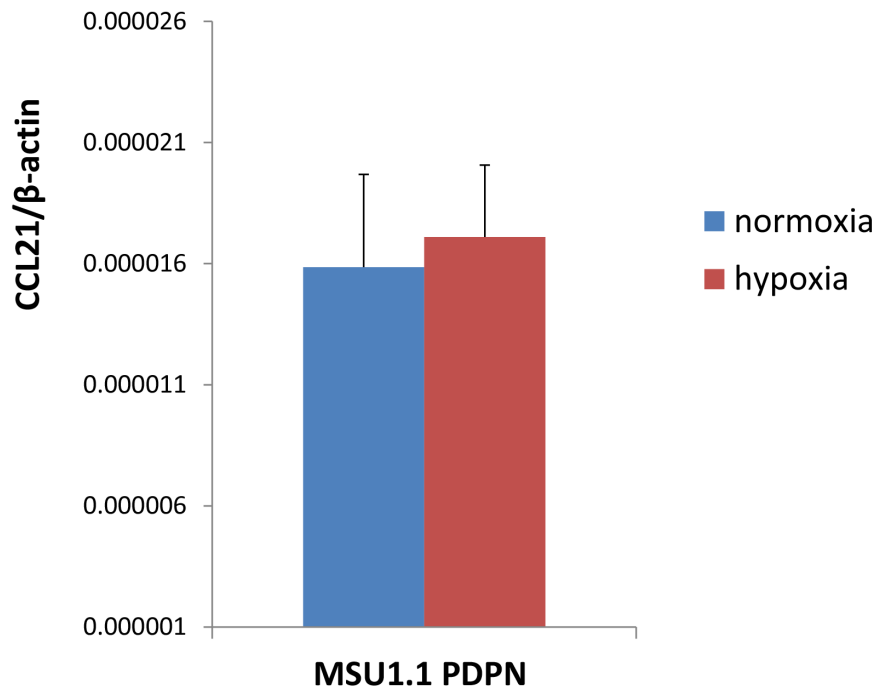

**Supplementary Figure 4: Expression of CCL21 in MSU1.1 PDPN fibroblasts upon treatment by hypoxia.** Cells were cultured for 24 hours in normoxia or hypoxia (O<sub>2</sub> 1%) then RNAs were extracted and quantified by RQPCR.
